# Supplementary material for: Selection and Validation of Reference Genes for RT-qPCR Analysis in Spinacia oleracea under Abiotic Stress
Source: PubMed Central journal article supplement (PMC7875621; doi:10.1155/2021/4853632), 2021-02-03
Supplement: 4853632.f1.pdf [file 4853632.f1.pdf]

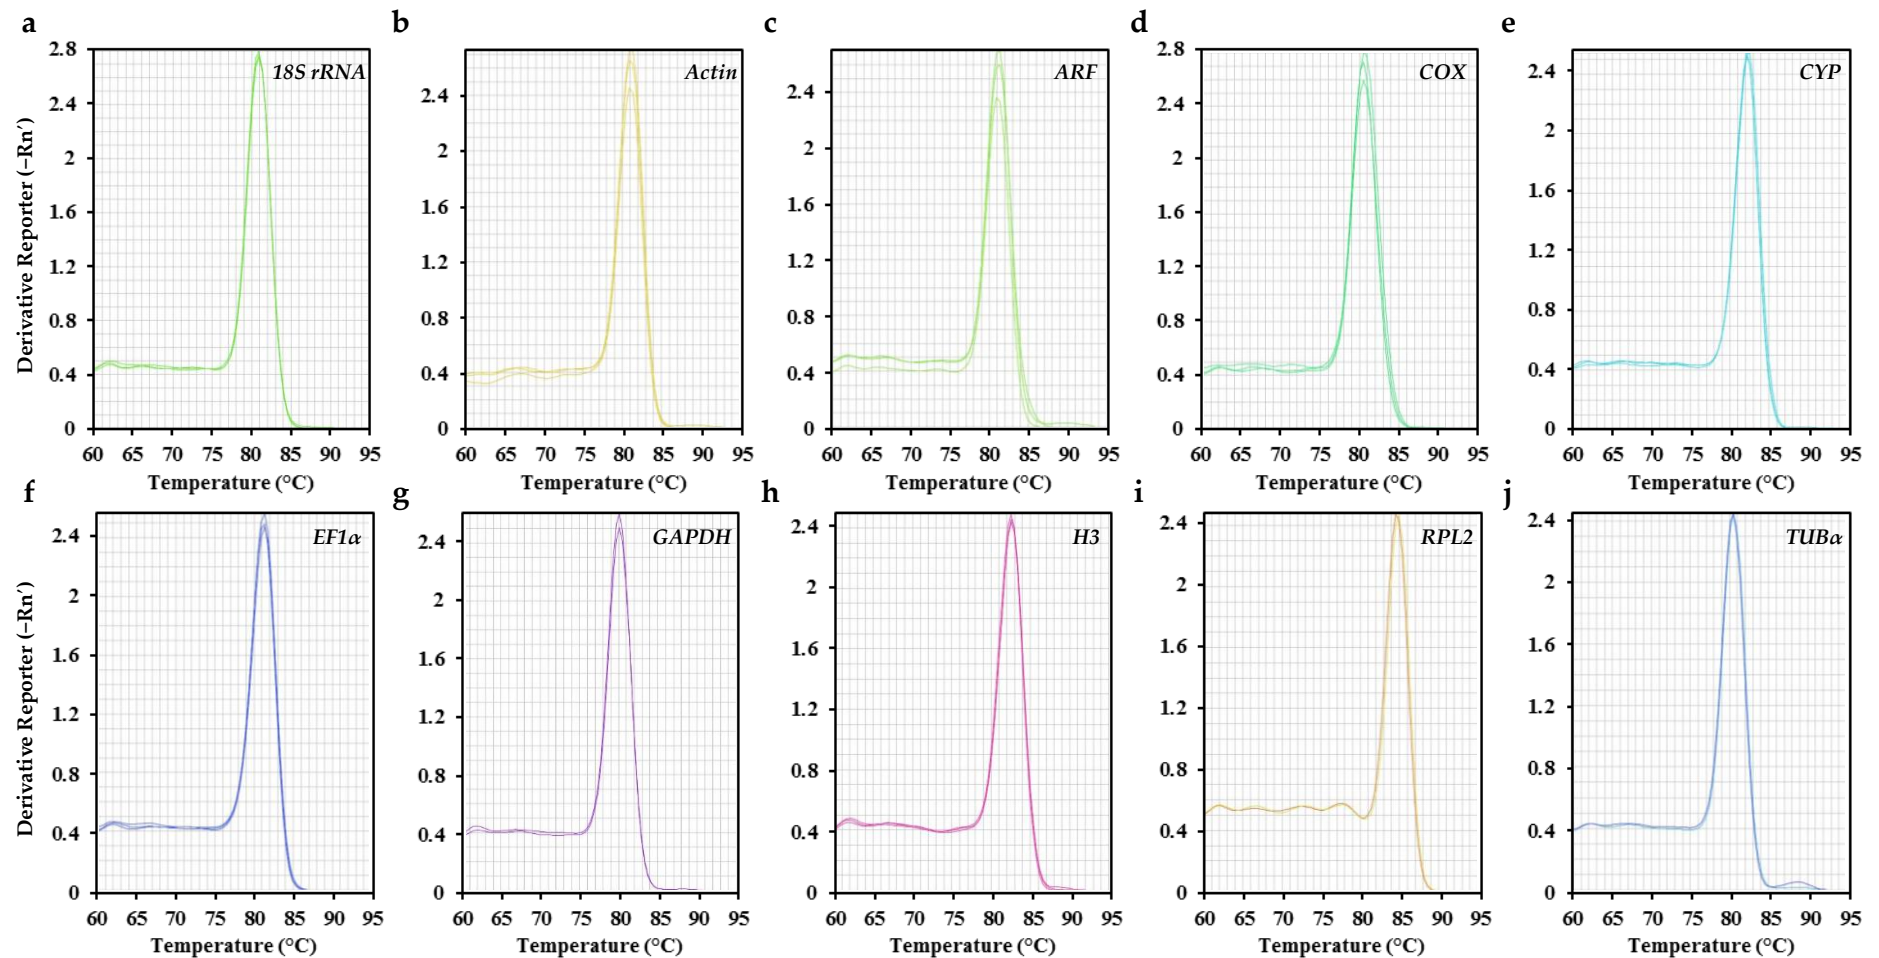

**Figure S1.** Specificity of primers used in RT-qPCR experiment. Melt Curves of each primer pairs were generated after amplification. Single peak represented high specificity of these primers. (a) *18S ribosomal RNA (18S rRNA)*, (b) *actin*, (c) *ADP (ribosylation factor ARF)*, (d) *cytochrome c oxidase (COX)*, (e) *cyclophilin (CYP)*, (f) *elongation factor 1-alpha (EF1 $\alpha$ )*, (g) *glyceraldehyde-3-phosphate dehydrogenase (GAPDH)*, (h) *histone H3 (H3)*, (i) *50S ribosomal protein L2 (RPL2)*, (j) *tubulin alpha chain (TUB $\alpha$ )*.

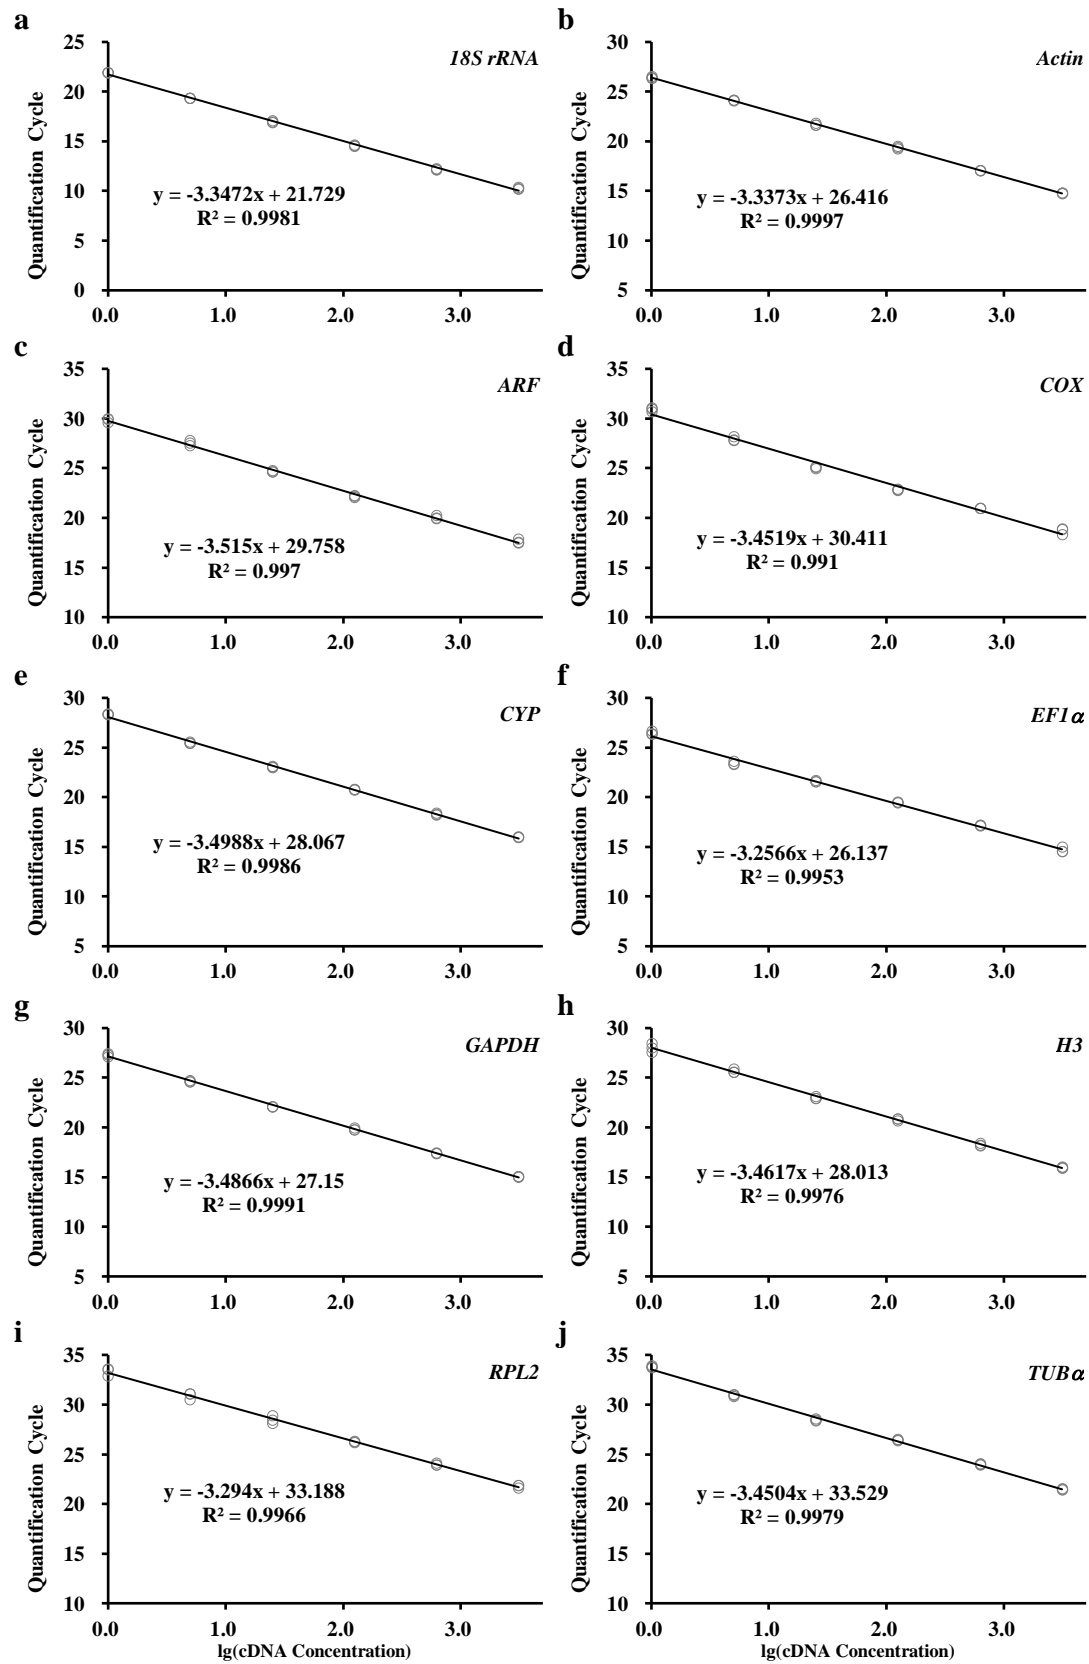

**Figure S2.** Standard curves of ten candidate reference genes. (a) *18S ribosomal RNA (18S rRNA)*, (b) *actin*, (c) *ADP (ribosylation factor ARF)*, (d) *cytochrome c oxidase (COX)*, (e) *cyclophilin (CYP)*, (f) *elongation factor 1-alpha (EF1α)*, (g) *glyceraldehyde-3-phosphate dehydrogenase (GAPDH)*, (h) *histone H3 (H3)*, (i) *50S ribosomal protein L2 (RPL2)*, (j) *tubulin alpha chain (TUBα)*.
